# Supplementary material for: First records of Canis dirus and Smilodon fatalis from the late Pleistocene Tule Springs local fauna, upper Las Vegas Wash, Nevada
Source: PeerJ. 2016 Jun 21;4:e2151. doi: 10.7717/peerj.2151 (PMC4924133; doi:10.7717/peerj.2151)
Supplement: Supplemental Information 1 [file peerj-04-2151-s001.xlsx]

## Sheet: Sheet1
Catalogue Prefix	Specimen Number	Genus	Species	L	W	Repository	Notes
LACM	61243	Canis	lupus	24.13	14.15	GCPM
LACM	61243	Canis	lupus	23.49	14.05	GCPM
LACM	61241	Canis	lupus	23.12	16.07	GCPM
LACM	61241	Canis	lupus	22.69	15.48	GCPM
YELL	151F	Canis	lupus	23.44	14.58	YNP	Data courtesy Sue Ware.
YELL	302M	Canis	lupus	28.11	14.61	YNP	Data courtesy Sue Ware.
YELL	447F	Canis	lupus	24.82	14.73	YNP	Data courtesy Sue Ware.
YELL	534M	Canis	lupus	26.76	15.32	YNP	Data courtesy Sue Ware.
YELL	691F	Canis	lupus	24.34	14.75	YNP	Data courtesy Sue Ware.
YELL	730F	Canis	lupus	24.85	13.84	YNP	Data courtesy Sue Ware.
YELL	733F	Canis	lupus	22.42	12.81	YNP	Data courtesy Sue Ware.
YELL	756F	Canis	lupus	24.96	13.98	YNP	Data courtesy Sue Ware.
YELL	729M	Canis	lupus	25.38	13.83	YNP	Data courtesy Sue Ware.
YELL	804M	Canis	lupus	23.16	12.58	YNP	Data courtesy Sue Ware.
ISRO	3529U	Canis	lupus	22.87	13.67	Isle Royale	Data courtesy Sue Ware.
ISRO	1872U	Canis	lupus	26.75	14.41	Isle Royale	Data courtesy Sue Ware.
ISRO	3998U	Canis	lupus	22.26	12.59	Isle Royale	Data courtesy Sue Ware.
UWZS	26265U	Canis	lupus	22.96	12.99	UW	Data courtesy Sue Ware.
UWZS	27700U	Canis	lupus	23.31	14.14	UW	Data courtesy Sue Ware.
UWZM	32127U	Canis	lupus	23.9	14.97	UW	Data courtesy Sue Ware.
UWZS	32191U	Canis	lupus	23.43	14.79	UW	Data courtesy Sue Ware.
UWZS	34189U	Canis	lupus	22.43	12.1	UW	Data courtesy Sue Ware.
UWZS	34190U	Canis	lupus	23.63	14.22	UW	Data courtesy Sue Ware.
UWZS	34461U	Canis	lupus	23.86	13.63	UW	Data courtesy Sue Ware.
UWZS	34569U	Canis	lupus	25.5	15	UW	Data courtesy Sue Ware.
UWZS	34594U	Canis	lupus	23.54	14.3	UW	Data courtesy Sue Ware.
UWZS	35951U	Canis	lupus	28.05	13.21	UW	Data courtesy Sue Ware.
