# Supplementary material for: First records of Canis dirus and Smilodon fatalis from the late Pleistocene Tule Springs local fauna, upper Las Vegas Wash, Nevada
Source: PeerJ. 2016 Jun 21;4:e2151. doi: 10.7717/peerj.2151 (PMC4924133; doi:10.7717/peerj.2151)
Supplement: Supplemental Information 3 [file peerj-04-2151-s003.xlsx]

## Sheet: Sheet1
Catalogue Prefix	Specimen Number	Genus	Species	Side	Age	Bp	DVH	LT	Locality	Repository
LACMHC	K-970	Smilodon	fatalis	L	AD	68.34	57.91	40.19	2	GCPM
LACMHC	K-972	Smilodon	fatalis	L	AD	83.74	65.22	53.6	2	GCPM
LACMHC	K-974	Smilodon	fatalis	L	AD	84.43	69.31	51.5	2	GCPM
LACMHC	K-971	Smilodon	fatalis	L	AD	82.34	65.57	45.7	2	GCPM
LACMHC	K-967	Smilodon	fatalis	L	AD	94.54	71.74	51.74	2	GCPM
LACMHC	K-968	Smilodon	fatalis	L	AD	90.42	75.84	49.43	2	GCPM
LACMHC	K-973	Smilodon	fatalis	L	AD	82.11	66.48	66.38	2	GCPM
LACMHC	K-969	Smilodon	fatalis	L	AD	78.41	68.15	44.84	2	GCPM
LACMHC	K-854	Smilodon	fatalis	L	AD	81.52	67.48	49.23	3	GCPM
LACMHC	K-963	Smilodon	fatalis	L	AD	79.79	69.24	48.43	3	GCPM
LACMHC	K-878	Smilodon	fatalis	L	AD	79.02	67.55	47.02	3	GCPM
LACMHC	K-865	Smilodon	fatalis	L	AD	85.69	65.51	51.38	3	GCPM
LACMHC	K-873	Smilodon	fatalis	L	AD	77.81	63.87	41.94	3	GCPM
LACMHC	K-869	Smilodon	fatalis	L	AD	83.13	68.06	47.62	3	GCPM
LACMHC	K-862	Smilodon	fatalis	L	AD	93.38	74.2	54.76	3	GCPM
LACMHC	K-874	Smilodon	fatalis	L	AD	83.5	66.78	51.36	3	GCPM
LACMHC	K-855	Smilodon	fatalis	L	AD	80.38	67.7	52.16	3	GCPM
LACMHC	K-856	Smilodon	fatalis	L	AD	87.23	72.03	52.21	3	GCPM
LACMHC	K-947	Smilodon	fatalis	L	AD	81.77	65.61	47.88	3	GCPM
LACMHC	K-847	Smilodon	fatalis	L	AD	89.8	67.6	52.52	3	GCPM
LACMHC	K-952	Smilodon	fatalis	L	AD	80.38	65.2	47.31	3	GCPM
LACMHC	K-858	Smilodon	fatalis	L	AD	86.59	73.01	52.72	3	GCPM
LACMHC	K-870	Smilodon	fatalis	L	AD	79.09	67.6	46.17	3	GCPM
LACMHC	K-886	Smilodon	fatalis	L	AD	78.42	67.28	48.7	3	GCPM
LACMHC	K-859	Smilodon	fatalis	L	AD	84.49	67.37	47.32	3	GCPM
LACMHC	K-863	Smilodon	fatalis	L	AD	80.82	64.24	48.34	3	GCPM
LACMHC	K-953	Smilodon	fatalis	L	AD	90.58	70.44	50.67	3	GCPM
LACMHC	K-857	Smilodon	fatalis	L	AD	81.87	68.64	49.32	3	GCPM
LACMHC	K-926	Smilodon	fatalis	L	AD	84.16	65.91	47.06	3	GCPM
LACMHC	K-880	Smilodon	fatalis	L	AD	76.06	59.04	40.59	3	GCPM
LACMHC	K-846	Smilodon	fatalis	L	AD	72.64	60.62	44.39	3	GCPM
LACMHC	K-860	Smilodon	fatalis	L	AD	86.73	69.44	53.85	3	GCPM
LACMHC	K-936	Smilodon	fatalis	L	AD	86.76	66.69	47.1	3	GCPM
LACMHC	K-862	Smilodon	fatalis	L	AD	90.08	69.92	51.78	3	GCPM
LACMHC	K-954	Smilodon	fatalis	L	AD	81.7	65	46.66	3	GCPM
LACMHC	K-844	Smilodon	fatalis	L	AD	79.74	63.67	43.57	3	GCPM
LACMHC	K-892	Smilodon	fatalis	L	AD	84.22	65.64	46.87	3	GCPM
LACMHC	K-867	Smilodon	fatalis	L	AD	82.52	65.91	46.34	3	GCPM
LACMHC	K-837	Smilodon	fatalis	L	AD	78.44	65.42	47.92	4	GCPM
LACMHC	K-811	Smilodon	fatalis	L	AD	70.4	57.75	39.74	4	GCPM
LACMHC	K-810	Smilodon	fatalis	L	AD	89.27	67.21	49.83	4	GCPM
LACMHC	K-812	Smilodon	fatalis	L	AD	78.65	69.42	47.44	4	GCPM
LACMHC	K-831	Smilodon	fatalis	L	AD	78.53	65.19	49.62	4	GCPM
LACMHC	K-841	Smilodon	fatalis	L	AD	82.94	66.07	50.36	4	GCPM
LACMHC	K-816	Smilodon	fatalis	L	AD	84.66	67.27	47.76	4	GCPM
LACMHC	K-807	Smilodon	fatalis	L	AD	83.23	65.77	47.12	4	GCPM
LACMHC	K-817	Smilodon	fatalis	L	AD	83.59	66.97	53.05	4	GCPM
LACMHC	K-836	Smilodon	fatalis	L	AD	90.97	70.26	51.86	4	GCPM
LACMHC	K-835	Smilodon	fatalis	L	AD	77.05	65.72	47.63	4	GCPM
LACMHC	K-821	Smilodon	fatalis	L	AD	76.39	63.99	44.78	4	GCPM
LACMHC	K-818	Smilodon	fatalis	L	AD	78.63	63.95	45.57	4	GCPM
LACMHC	K-814	Smilodon	fatalis	L	AD	70.76	60.26	43.62	4	GCPM
LACMHC	K-826	Smilodon	fatalis	L	AD	74.57	64.62	46.74	4	GCPM
LACMHC	K-822	Smilodon	fatalis	L	AD	87.02	66.56	51.07	4	GCPM
LACMHC	K-833	Smilodon	fatalis	L	AD	75.13	63.43	48.45	4	GCPM
LACMHC	K-834	Smilodon	fatalis	L	AD	95.68	70.94	53.47	4	GCPM
LACMHC	K-982	Smilodon	fatalis	L	AD	76.1	66.28	47.78	4	GCPM
LACMHC	K-820	Smilodon	fatalis	L	AD	80.87	70.51	51	4	GCPM
LACMHC	K-823	Smilodon	fatalis	L	AD	81.83	61.35	46.74	4	GCPM
LACMHC	K-827	Smilodon	fatalis	L	AD	80.65	69.21	51.3	4	GCPM
LACMHC	K-829	Smilodon	fatalis	L	AD	78.98	68.32	55.85	4	GCPM
LACMHC	K-824	Smilodon	fatalis	L	AD	83.45	67.26	49.55	4	GCPM
LACMHC	K-838	Smilodon	fatalis	L	AD	82.26	65.64	50.13	4	GCPM
LACMHC	K-808	Smilodon	fatalis	L	AD	81.27	67.01	46.77	4	GCPM
LACMHC	K-828	Smilodon	fatalis	L	AD	79.49	67.67	46.66	4	GCPM
LACMHC	K-792	Smilodon	fatalis	L	AD	81.19	66.23	46.15	13	GCPM
LACMHC	K-796	Smilodon	fatalis	L	AD	90.35	72.95	52.07	13	GCPM
LACMHC	K-796	Smilodon	fatalis	L	AD	89.61	72.56	49.82	13	GCPM
LACMHC	K-784	Smilodon	fatalis	L	AD	85.04	66.06	53.14	13	GCPM
LACMHC	K-778	Smilodon	fatalis	L	AD	86.49	68.59	47.41	57	GCPM
LACMHC	K-770	Smilodon	fatalis	L	AD	85.68	63.51	51.64	60	GCPM
LACMHC	K-777	Smilodon	fatalis	L	AD	86.4	65.84	47.42	60	GCPM
LACMHC	K-773	Smilodon	fatalis	L	AD	93.15	69.98	50.26	60	GCPM
LACMHC	K-775	Smilodon	fatalis	L	AD	86.69	69.49	51.64	60	GCPM
LACMHC	K-745	Smilodon	fatalis	L	AD	83.99	67.11	43.65	61	GCPM
LACMHC	K-742	Smilodon	fatalis	L	AD	80.56	64.94	46.61	61	GCPM
LACMHC	K-751	Smilodon	fatalis	L	AD	86.22	68.94	53.04	61	GCPM
LACMHC	K-762	Smilodon	fatalis	L	AD	85.52	65.15	50.43	61	GCPM
LACMHC	K-753	Smilodon	fatalis	L	AD	83.51	68.48	48.04	61	GCPM
LACMHC	K-757	Smilodon	fatalis	L	AD	81.49	64.3	50.01	61	GCPM
LACMHC	K-760	Smilodon	fatalis	L	AD	85.28	63.19	48.89	61	GCPM
LACMHC	K-983	Smilodon	fatalis	L	AD	76.9	67.03	44.47	61	GCPM
LACMHC	K-766	Smilodon	fatalis	L	AD	89.93	69.78	52.3	61	GCPM
LACMHC	K-749	Smilodon	fatalis	L	AD	86.81	72.02	52.34	61	GCPM
LACMHC	K-765	Smilodon	fatalis	L	AD	86.99	74.7	52.95	61	GCPM
LACMHC	K-748	Smilodon	fatalis	L	AD	92.01	68.44	54.77	61	GCPM
LACMHC	K-767	Smilodon	fatalis	L	AD	79.2	62.27	49.61	61	GCPM
LACMHC	K-750	Smilodon	fatalis	L	AD	79.74	64.28	48.36	61	GCPM
LACMHC	K-758	Smilodon	fatalis	L	AD	81.61	64.28	47.07	61	GCPM
LACMHC	K-764	Smilodon	fatalis	L	AD	77.42	63.04	46.87	61	GCPM
LACMHC	K-755	Smilodon	fatalis	L	AD	82.35	68.98	50.57	61	GCPM
LACMHC	K-746	Smilodon	fatalis	L	AD	87.17	65.3	49.65	61	GCPM
LACMHC	K-761	Smilodon	fatalis	L	AD	87.21	71.08	45.91	61	GCPM
LACMHC	K-763	Smilodon	fatalis	L	AD	84.07	69.82	46.57	61	GCPM
LACMHC	32488	Smilodon	fatalis	L	AD	88.63	64.97	50.92	61	GCPM
LACMHC	32493	Smilodon	fatalis	L	AD	88.24	72.49	51.94	61	GCPM
LACMHC	K-702	Smilodon	fatalis	L	AD	77.61	61.52	43.45	77	GCPM
LACMHC	K-696	Smilodon	fatalis	L	AD	76.13	59.4	43.84	77	GCPM
LACMHC	K-701	Smilodon	fatalis	L	AD	75.26	61.58	43.4	77	GCPM
LACMHC	K-698	Smilodon	fatalis	L	AD	82.28	68.53	53.15	77	GCPM
LACMHC	K-709	Smilodon	fatalis	L	AD	77.61	63.55	48.47	77	GCPM
