# Supplementary material for: First records of Canis dirus and Smilodon fatalis from the late Pleistocene Tule Springs local fauna, upper Las Vegas Wash, Nevada
Source: PeerJ. 2016 Jun 21;4:e2151. doi: 10.7717/peerj.2151 (PMC4924133; doi:10.7717/peerj.2151)
Supplement: Supplemental Information 5 [file peerj-04-2151-s005.xlsx]

## Sheet: Sheet1
Catalogue Prefix	Specimen Number	Genus	Species	Side	Age	L	W	Locality	Repository
LACMHC	PP9754	Canis	dirus	R		26.73	19.03	67	GCPM
LACMHC	PP9730	Canis	dirus	R		28.34	18.57	67	GCPM
LACMHC	PP9737	Canis	dirus	R		29.3	18.45	67	GCPM
LACMHC	PP9715	Canis	dirus	R		29.61	18.56	67	GCPM
LACMHC	PP9710	Canis	dirus	R		28.47	19.54	67	GCPM
LACMHC	PP9732	Canis	dirus	R		29.09	17.62	67	GCPM
LACMHC	PP9752	Canis	dirus	R		31.1	18.71	67	GCPM
LACMHC	PP9741	Canis	dirus	R		27.42	17.69	67	GCPM
LACMHC	PP9740	Canis	dirus	R		29.55	18.97	67	GCPM
LACMHC	PP9726	Canis	dirus	R		28.35	18.98	67	GCPM
LACMHC	PP9706	Canis	dirus	R		29.21	16.87	67	GCPM
LACMHC	PP9744	Canis	dirus	R		29.32	16.38	67	GCPM
LACMHC	PP9711	Canis	dirus	R		24.53	17.15	67	GCPM
LACMHC	PP9753	Canis	dirus	R		27.63	17.49	67	GCPM
LACMHC	PP9716	Canis	dirus	R		29.08	18.13	67	GCPM
LACMHC	PP9739	Canis	dirus	R		26.31	17.81	67	GCPM
LACMHC	PP9738	Canis	dirus	R		24.09	17.56	67	GCPM
LACMHC	PP9748	Canis	dirus	R		24.34	16.1	67	GCPM
LACMHC	PP9906	Canis	dirus	R		25.73	18.63	77	GCPM
LACMHC	PP9755	Canis	dirus	R		26.92	19.26	77	GCPM
LACMHC	PP9809	Canis	dirus	R		26.89	17.55	77	GCPM
LACMHC	PP9829	Canis	dirus	R		29.5	17.73	77	GCPM
LACMHC	PP9874	Canis	dirus	R		27.64	17.98	77	GCPM
LACMHC	PP9819	Canis	dirus	R		29.06	19.33	77	GCPM
LACMHC	PP9890	Canis	dirus	R		26.2	16.97	77	GCPM
LACMHC	PP9888	Canis	dirus	R		26.3	16.69	77	GCPM
LACMHC	PP9813	Canis	dirus	R		28.11	17.87	77	GCPM
LACMHC	PP9871	Canis	dirus	R		26.18	18.98	77	GCPM
LACMHC	PP9867	Canis	dirus	R		27.84	18.41	77	GCPM
LACMHC	PP9866	Canis	dirus	R		26.49	18.65	77	GCPM
LACMHC	PP9759	Canis	dirus	R		26.02	17.57	77	GCPM
LACMHC	PP9894	Canis	dirus	R		28.15	17.92	77	GCPM
LACMHC	PP9760	Canis	dirus	R		29.21	19.34	77	GCPM
LACMHC	PP9807	Canis	dirus	R		28.62	19.42	77	GCPM
LACMHC	PP9810	Canis	dirus	R		26.44	19.31	77	GCPM
LACMHC	PP9758	Canis	dirus	R		28.27	20.49	77	GCPM
LACMHC	PP9865	Canis	dirus	R		27.27	17.2	77	GCPM
LACMHC	PP9763	Canis	dirus	R		30.09	18.71	77	GCPM
LACMHC	PP9861	Canis	dirus	R		27.54	17.91	77	GCPM
LACMHC	PP9910	Canis	dirus	R		26.79	15.66	77	GCPM
LACMHC	PP9772	Canis	dirus	R		29.82	19.85	77	GCPM
LACMHC	PP9785	Canis	dirus	R		24.82	17.85	77	GCPM
LACMHC	PP9840	Canis	dirus	R		25.22	18.56	77	GCPM
LACMHC	PP9787	Canis	dirus	R		28.77	19.13	77	GCPM
LACMHC	PP9812	Canis	dirus	R		28	18.81	77	GCPM
LACMHC	PP9854	Canis	dirus	R		25.92	18.25	77	GCPM
LACMHC	PP9818	Canis	dirus	R		27.15	18.53	77	GCPM
LACMHC	PP9793	Canis	dirus	R		28.15	19.01	77	GCPM
LACMHC	PP9843	Canis	dirus	R		27.15	16.94	77	GCPM
LACMHC	PP9957	Canis	dirus	R		25.79	18.27	77	GCPM
LACMHC	PP9848	Canis	dirus	R		25.27	17.54	77	GCPM
LACMHC	PP9912	Canis	dirus	R		26.61	17.67	77	GCPM
LACMHC	PP9801	Canis	dirus	R		27.34	18.43	77	GCPM
LACMHC	PP9908	Canis	dirus	R		27.13	17.2	77	GCPM
LACMHC	PP9797	Canis	dirus	R		27.41	18.32	77	GCPM
LACMHC	PP9895	Canis	dirus	R		26.49	18.81	77	GCPM
LACMHC	PP9850	Canis	dirus	R		27.12	18.61	77	GCPM
LACMHC	PP9887	Canis	dirus	R		25.28	18.11	77	GCPM
LACMHC	PP9859	Canis	dirus	R		27.51	17.93	77	GCPM
LACMHC	PP9768	Canis	dirus	R		25.96	19.35	77	GCPM
LACMHC	PP9984	Canis	dirus	R		28.09	17.65	77	GCPM
LACMHC	PP9902	Canis	dirus	R		26.51	18.91	77	GCPM
LACMHC	PP9877	Canis	dirus	R		29.5	18.17	77	GCPM
LACMHC	PP9788	Canis	dirus	R		25.45	18.15	77	GCPM
LACMHC	PP9827	Canis	dirus	R		26.37	18.18	77	GCPM
LACMHC	PP9876	Canis	dirus	R		28.28	18.35	77	GCPM
LACMHC	PP9839	Canis	dirus	R		26.02	19.07	77	GCPM
LACMHC	PP9833	Canis	dirus	R		27	17.68	77	GCPM
LACMHC	PP9901	Canis	dirus	R		26.97	17.96	77	GCPM
LACMHC	PP9892	Canis	dirus	R		28.84	18.79	77	GCPM
LACMHC	PP9789	Canis	dirus	R		25.53	17.86	77	GCPM
LACMHC	PP9778	Canis	dirus	R		25.86	19.16	77	GCPM
LACMHC	PP9893	Canis	dirus	R		25.04	19	77	GCPM
LACMHC	PP9775	Canis	dirus	R		28.98	19.95	77	GCPM
LACMHC	PP9879	Canis	dirus	R		29.21	19.21	77	GCPM
LACMHC	PP9914	Canis	dirus	R		27.82	18.4	77	GCPM
LACMHC	PP9832	Canis	dirus	R	?JUV	23.8	17.73	77	GCPM
LACMHC	PP9885	Canis	dirus	R		25.6	18.63	77	GCPM
LACMHC	PP9905	Canis	dirus	R		26.82	18.38	77	GCPM
LACMHC	PP9845	Canis	dirus	R		27.38	18.69	77	GCPM
LACMHC	PP9836	Canis	dirus	R		26.22	17.41	77	GCPM
LACMHC	PP9891	Canis	dirus	R		29.77	18.85	77	GCPM
LACMHC	PP9900	Canis	dirus	R		27.76	18.91	77	GCPM
LACMHC	PP9858	Canis	dirus	R		25.74	17.68	77	GCPM
LACMHC	PP9791	Canis	dirus	R		27.68	19.19	77	GCPM
LACMHC	PP9855	Canis	dirus	R		25.67	17.59	77	GCPM
LACMHC	PP9765	Canis	dirus	R		27.41	18.63	77	GCPM
LACMHC	PP9756	Canis	dirus	R		25.92	18.38	77	GCPM
LACMHC	PP9804	Canis	dirus	R		28.57	18.03	77	GCPM
LACMHC	PP9803	Canis	dirus	R		26.01	17.54	77	GCPM
LACMHC	PP9863	Canis	dirus	R		26.75	18.31	77	GCPM
LACMHC	PP9762	Canis	dirus	R		27.84	18.25	77	GCPM
LACMHC	PP9786	Canis	dirus	R		26.09	17.54	77	GCPM
LACMHC	PP9847	Canis	dirus	R		26.89	18.13	77	GCPM
LACMHC	PP9862	Canis	dirus	R		25.14	17.34	77	GCPM
LACMHC	PP9770	Canis	dirus	R		24.61	16.56	77	GCPM
LACMHC	PP9911	Canis	dirus	R		27.67	18.77	77	GCPM
LACMHC	PP9774	Canis	dirus	R		26.2	18.59	77	GCPM
LACMHC	PP9835	Canis	dirus	R		24.95	17.7	77	GCPM
LACMHC	PP9882	Canis	dirus	R		26.26	16.91	77	GCPM
LACMHC	PP9853	Canis	dirus	R		25.95	17.57	77	GCPM
LACMHC	PP9880	Canis	dirus	R		27.01	18.04	77	GCPM
LACMHC	PP9907	Canis	dirus	R		23.96	16.74	77	GCPM
LACMHC	PP9842	Canis	dirus	R		24.8	16.27	77	GCPM
LACMHC	12941	Canis	dirus	R		29.4	18.45	77	GCPM
LACMHC	PP9903	Canis	dirus	R		27.47	18.11	77	GCPM
